# Supplementary material
Source: MDPI journal article supplement (https://www.mdpi.com/1996-1073/17/4/810)
Supplement: s1 [file s1]

## Supporting Information

# Enhancing the Storage Performance and Thermal Stability of Ni-Rich Layered Cathodes by Introducing $\text{Li}_2\text{MnO}_3$

Jun Yang <sup>1,\*</sup>, Pingping Yang <sup>1</sup> and Hongyu Wang <sup>2</sup>

<sup>1</sup> Shaanxi Key Laboratory of Green Preparation and Functionalization for Inorganic Materials, School of Materials Science & Engineering, Shaanxi University of Science & Technology, Xi'an 710021, China

<sup>2</sup> Qinghai Provincial Key Laboratory of New Light Alloys, Qinghai University, Xining 810016, China

\* Correspondence: yangjunc1@sust.edu.cn

**Table S1.** ICP results for the chemical composition of the as-prepared cathodes powders.

| Samples    | Li    | Ni    | Mn    | Co    |
|------------|-------|-------|-------|-------|
| NCM-811    | 1.08  | 0.77  | 0.09  | 0.1   |
| LNCMO-1090 | 1.105 | 0.671 | 0.168 | 0.086 |

**Table S2.** Crystal structural parameters of the cathodes powders.

| Samples        | a (Å)   | c (Å)    | Volume (Å <sup>3</sup> ) | c/a     | I <sub>003</sub> /I <sub>104</sub> | Ni <sup>2+</sup> in Li layer (%) |
|----------------|---------|----------|--------------------------|---------|------------------------------------|----------------------------------|
| NCM-811        | 2.87297 | 14.20675 | 101.552                  | 4.94498 | 1.60                               | 1.72                             |
| LNCMO-1090     | 2.86617 | 14.19977 | 101.022                  | 4.95427 | 1.46                               | 1.76                             |
| NCM-811-Air    | 2.87272 | 14.22049 | 101.632                  | 4.95018 | 1.55                               | 1.73                             |
| LNCMO-1090-Air | 2.86609 | 14.21467 | 101.122                  | 4.95960 | 1.44                               | 1.83                             |

**Table S3.** Fitting values of the electrochemical impedance (EIS) curves of the cathodes charged to 4.3 V before and after storage obtained from equivalent circuit in the inset of Figure 5.

| Samples    |                | R <sub>f</sub> (Ω) | R <sub>ct</sub> (Ω) | Total (R <sub>f</sub> +R <sub>ct</sub> ) |
|------------|----------------|--------------------|---------------------|------------------------------------------|
| NCM-811    | Before storage | 59                 | 62                  | 121                                      |
|            | After storage  | 98                 | 163                 | 261                                      |
| LNCMO-1090 | Before storage | 64                 | 77                  | 141                                      |
|            | After storage  | 90                 | 147                 | 237                                      |

**Table S4.** Analysis of the relative content of surface elements from XPS results.

| Samples        | C (%) | O (%) | Ni (%) | Co (%) | Mn (%) |
|----------------|-------|-------|--------|--------|--------|
| NCM-811        | 33.35 | 59.24 | 5.45   | 0.52   | 1.45   |
| LNCMO-1090     | 31.28 | 60.20 | 5.18   | 0.71   | 2.63   |
| NCM-811-Air    | 36.27 | 60.89 | 1.97   | 0.31   | 0.56   |
| LNCMO-1090-Air | 35.89 | 61.56 | 1.97   | 0.16   | 0.43   |

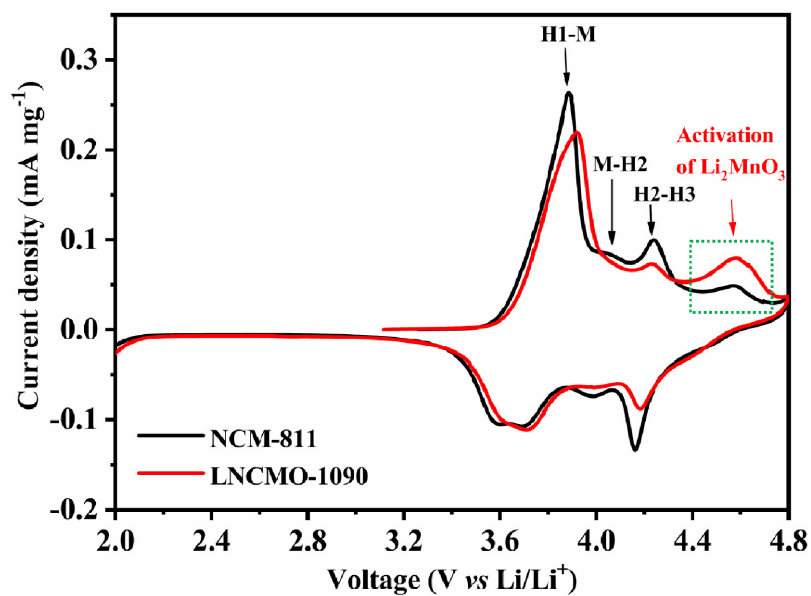

**Figure S1.** The first cyclic voltammogram curves and phase transitions of the as-prepared cathodes at a scan rate of  $0.1 \text{ mV s}^{-1}$  between 2.0 and 4.8 V vs  $\text{Li/Li}^+$ .

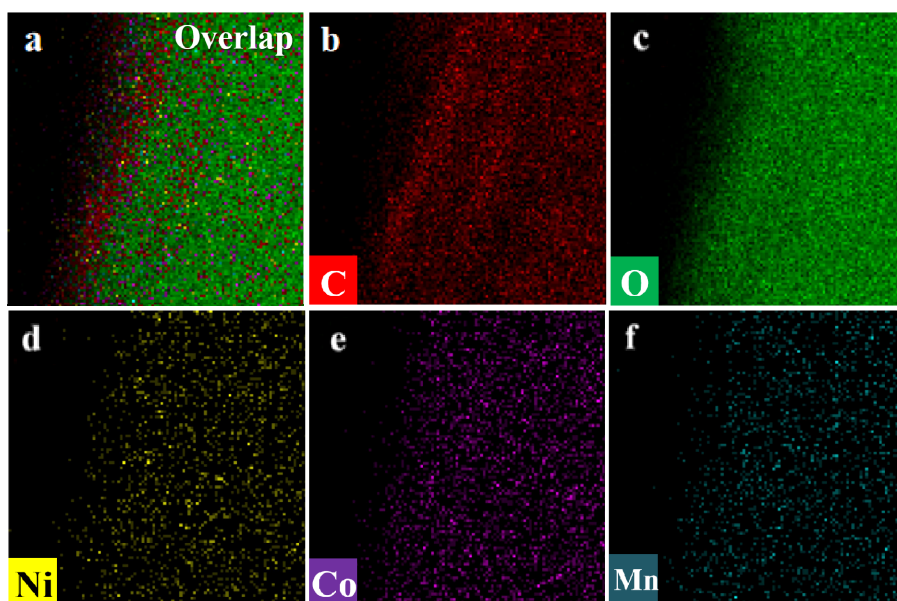

**Figure S2.** EDS mapping of NCM-811-Air. (a) multiple signal superimposed images, (b-f) C, O, Ni, Co, and Mn signals, respectively.

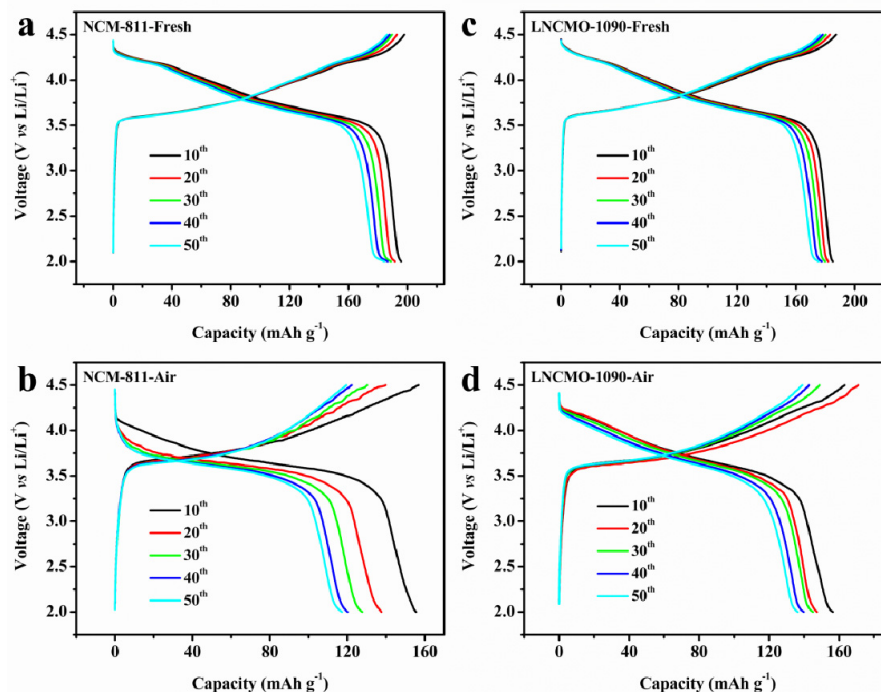

**Figure S3.** The charge/discharge profiles at different cycles of (a, b) the NCM-811 and (c, d) LNCMO-1090 cathodes before and after storage at a rate of 0.1 C between 2.0 and 4.5 V vs Li/Li<sup>+</sup>: (a, c) before storage, (b, d) after storage.

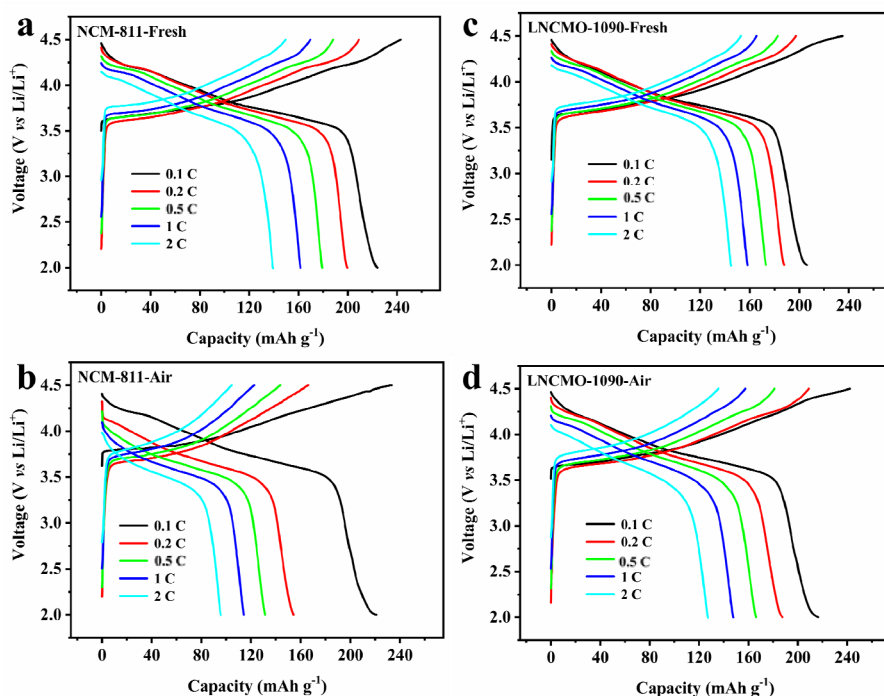

**Figure S4.** The charge/discharge profiles at different rates of (a, b) the NCM-811 and (c, d) LNCMO-1090 cathodes before and after storage between 2.0 and 4.5 V vs Li/Li<sup>+</sup>: (a, c) before storage, (b, d) after storage.

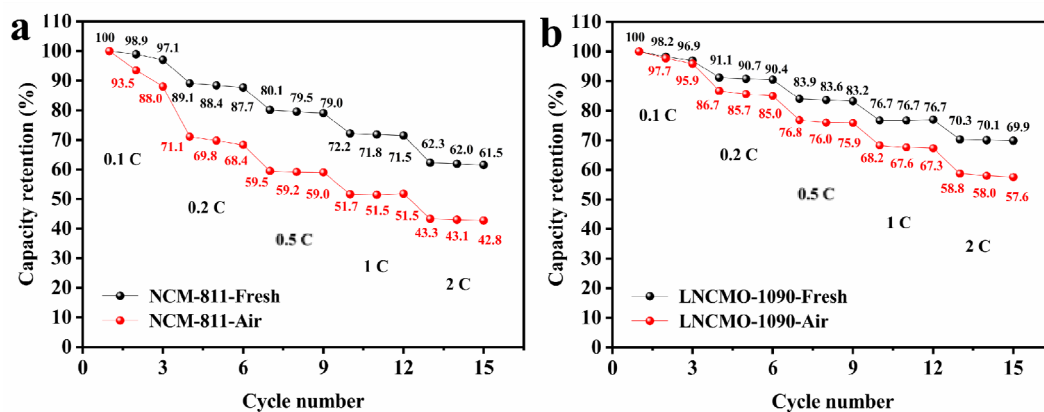

**Figure S5.** The capacity retention at different rates of (a) the NCM-811 and (b) LNCMO-1090 cathodes before and after storage between 2.0 and 4.5 V vs Li/Li<sup>+</sup>.

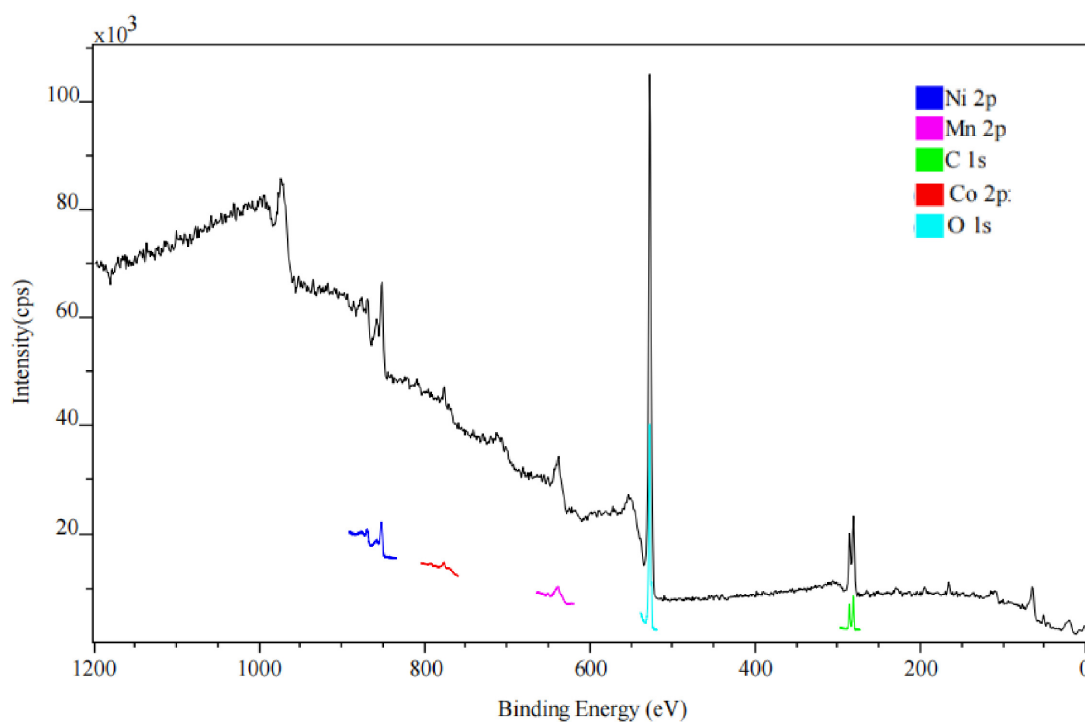

**Figure S6.** The broad spectrum of XPS for NCM-811 cathodes.

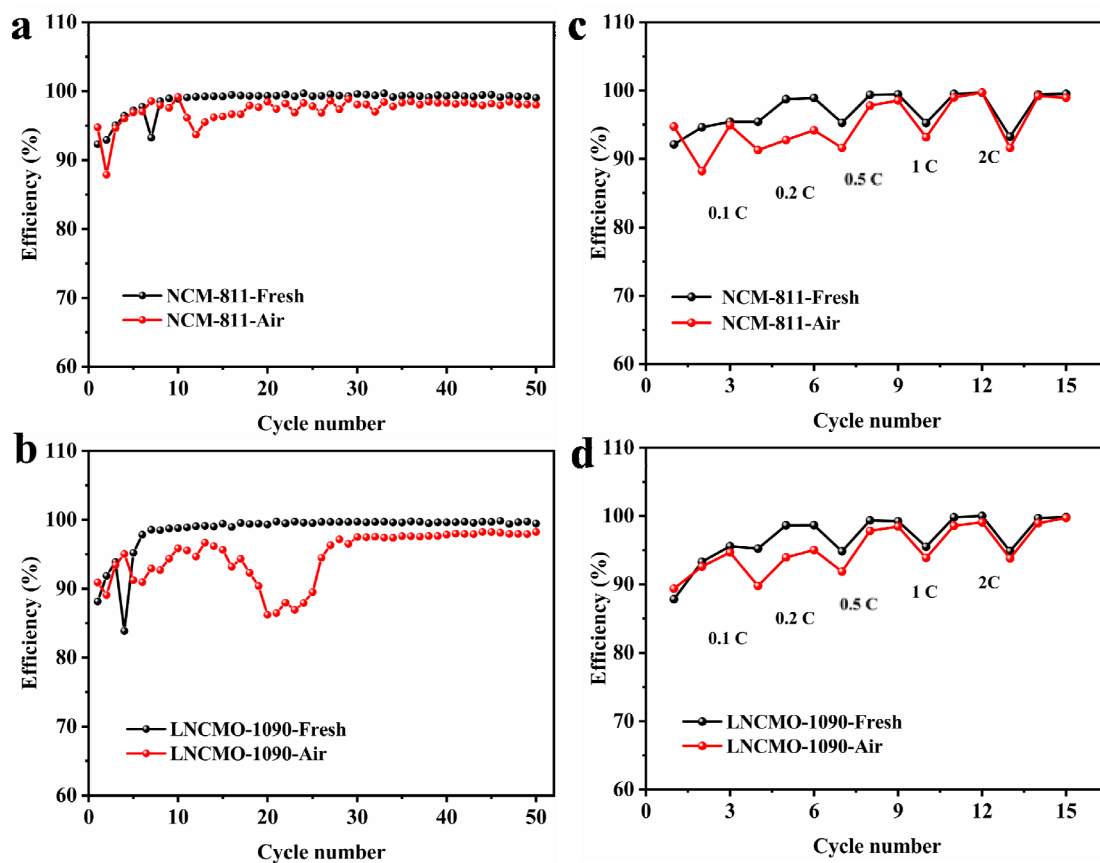

**Figure S7.** Comparison of electrochemical performance of cathode materials before and after storage: (a, b) Coulombic efficiency of cycling performance; (c, d) Coulombic efficiency of rate performance.
